# Supplementary material
Source: Springer Nature journal article supplement (https://www.springermedizin.de/resource/supplementary/12865_2002_27_MOESM3_ESM.pdf/9428346)

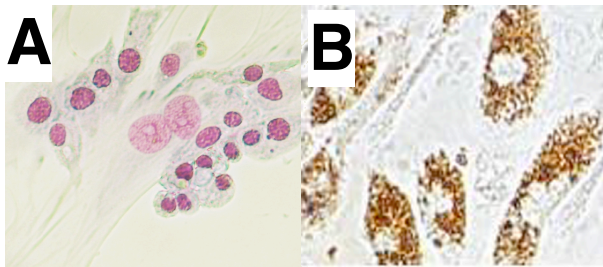

**C**

**control cells**

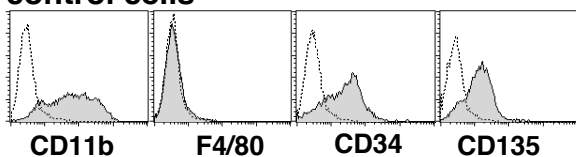

**+ M-CSF**

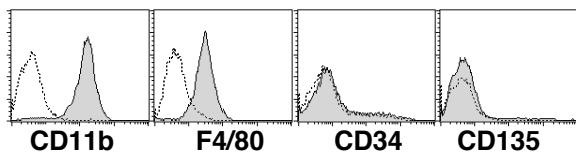

**D**

**day 6-FL  
cells**

**day 8-FL  
cells**

**day 11-FL  
cells**

**F4/80**

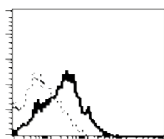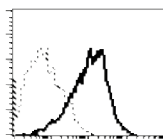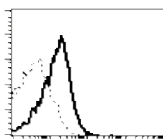

**CD11b**

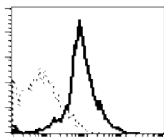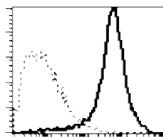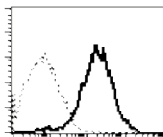

Supplement: MOESM3 [file 9428346]
